# Supplementary material
Source: PubMed Central journal article supplement (PMC9288870)
Supplement: NIHMS1821082-supplement-Supplemental_Material.pdf [file NIHMS1821082-supplement-Supplemental_Material.pdf]

This file serves as supplementary information for the paper:

**“Nuclear Magnetic Resonance Diffusometry of Linear and Branched Wormlike Micelles”**

Samuel Holder,<sup>1,2</sup> Samuel C. Grant<sup>1,2</sup> and Hadi Mohammadigoushki<sup>1,2\*</sup>

<sup>1</sup>*Department of Chemical & Biomedical Engineering, FAMU-FSU College of Engineering, Tallahassee, FL, 32310, United States*

<sup>2</sup>*Center for Interdisciplinary Magnetic Resonance, National High Magnetic Field Laboratory, Florida State University, Tallahassee, FL, USA 32310*

This supplementary material consists of 2 pages, 1 figure and 1 table.

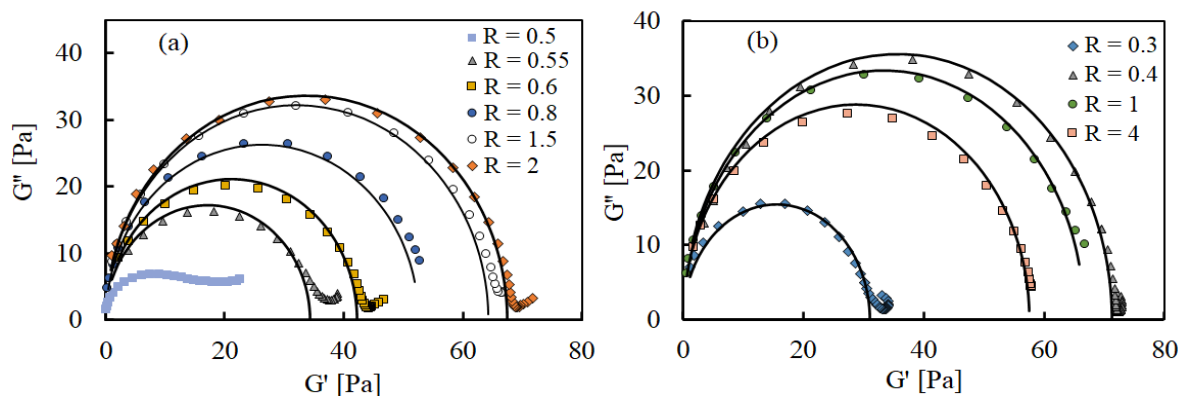

**FIGURE S1.** Cole-Cole plots for wormlike micellar solutions (a) CPCI/NaSal and (b) CTAB/NaSal. The continuous curves illustrate the fit to the single mode Maxwell model. A single mode Maxwell model is described as:  $G'(\omega) = G_0 \frac{\omega^2 \tau_R^2}{1 + \omega^2 \tau_R^2}$ ,  $G''(\omega) = G_0 \frac{\omega \tau_R}{1 + \omega^2 \tau_R^2}$ .  $G'$ ,  $G''$ ,  $\omega$ ,  $\tau_R$  are storage modulus, loss modulus, angular frequency and the longest relaxation time, respectively. The micellar breakage ratio is calculated by using the following relation  $\tau_R = (\tau_{br} \cdot \tau_{rep})^{1/2}$ , where  $\tau_b$  and  $\tau_r$  denote the breakage time and the reptation time, respectively. The breakage time is estimated as the inverse of the frequency at which loss modulus shows a local minimum.

| Fluid      | Salt concentration (mM) | $\eta_0$ (Pa.s) | $\tau_R$ (s) | $\tau_b$ (s) |
|------------|-------------------------|-----------------|--------------|--------------|
| CTAB/NaSal | 30                      | 1300            | 33           | 0.149        |
|            | 40                      | 3900            | 92           | 0.227        |
|            | 60                      | 1560            | 39.5         | 0.18         |
|            | 80                      | 67              | 1.6          | 0.017        |
|            | 100                     | 10.09           | 0.24         | 0.011 [1]    |
|            | 150                     | 23              | 0.49         | 0.013 [1]    |
|            | 200                     | 98              | 1.9          | 0.017        |
|            | 400                     | 34              | 0.93         | 0.013        |
| CPCI/NaSal | 45                      | 0.5             | 0.092        | --           |
|            | 50                      | 16.5            | 1.2          | --           |
|            | 55                      | 118             | 3.36         | 0.042        |
|            | 60                      | 230             | 5.82         | 0.045        |
|            | 80                      | 5.5             | 0.182        | --           |
|            | 90                      | 0.8             | 0.12         | --           |
|            | 150                     | 44              | 0.82         | 0.013        |
|            | 200                     | 320             | 5.5          | 0.056        |
|            | 300                     | 54              | 1.3          | 0.014        |
|            | 400                     | 1.9             | 0.041        | --           |

**Table S(1).** Rheological properties of the micellar solutions used in this study.

[1] J. Galvan-Miyoshi, J. Delgado and R. Castillo, "Diffusing wave spectroscopy in maxwellian fluids," *The European Physical Journal E*, vol. 26, p. 369–377, 2008.
